# Supplementary material
Source: PubMed Central journal article supplement (PMC2234784)

**A**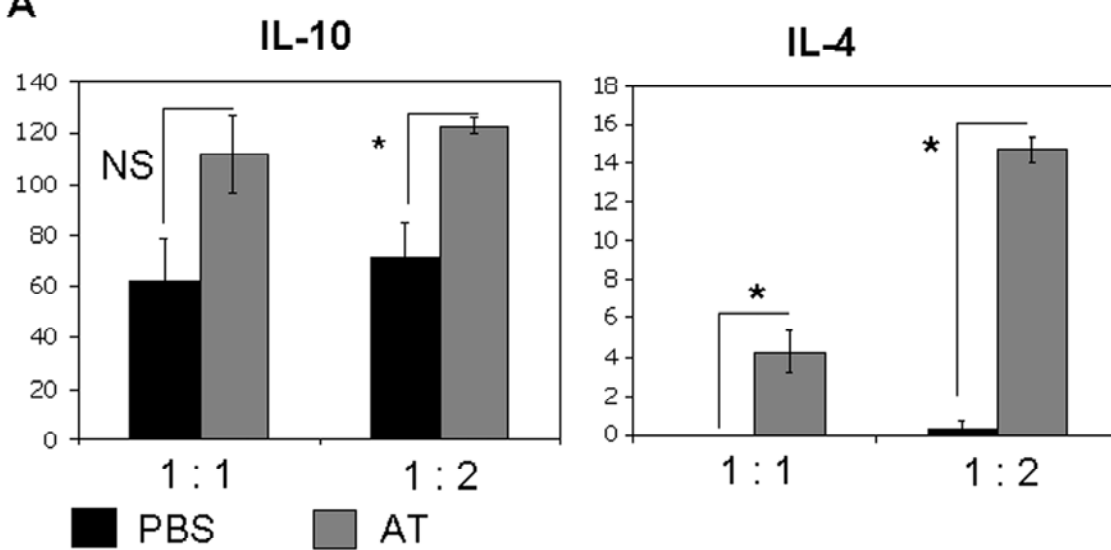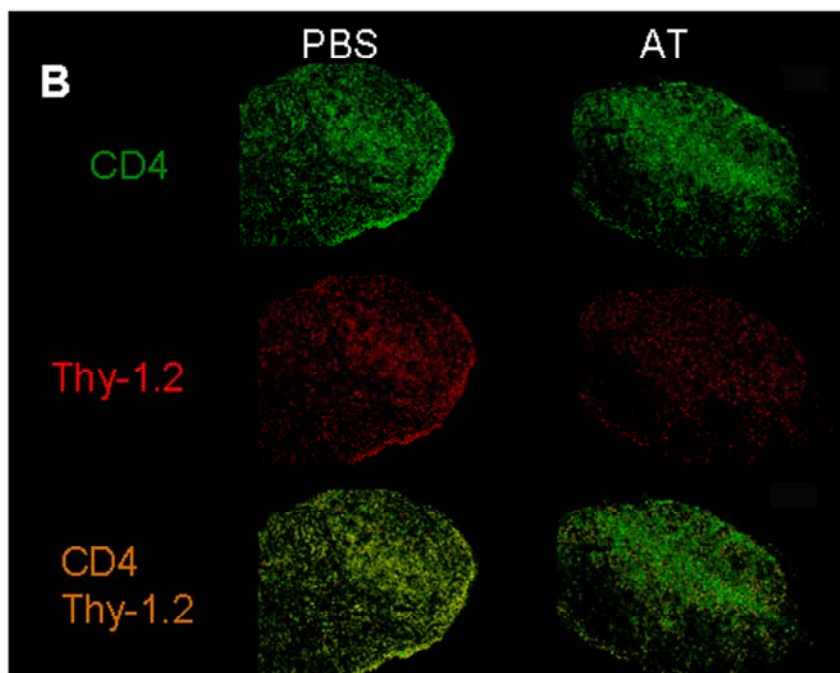

Supplement: blood_blood-2007-08-106005_1.pdf [file blood_blood-2007-08-106005_1.pdf]

A

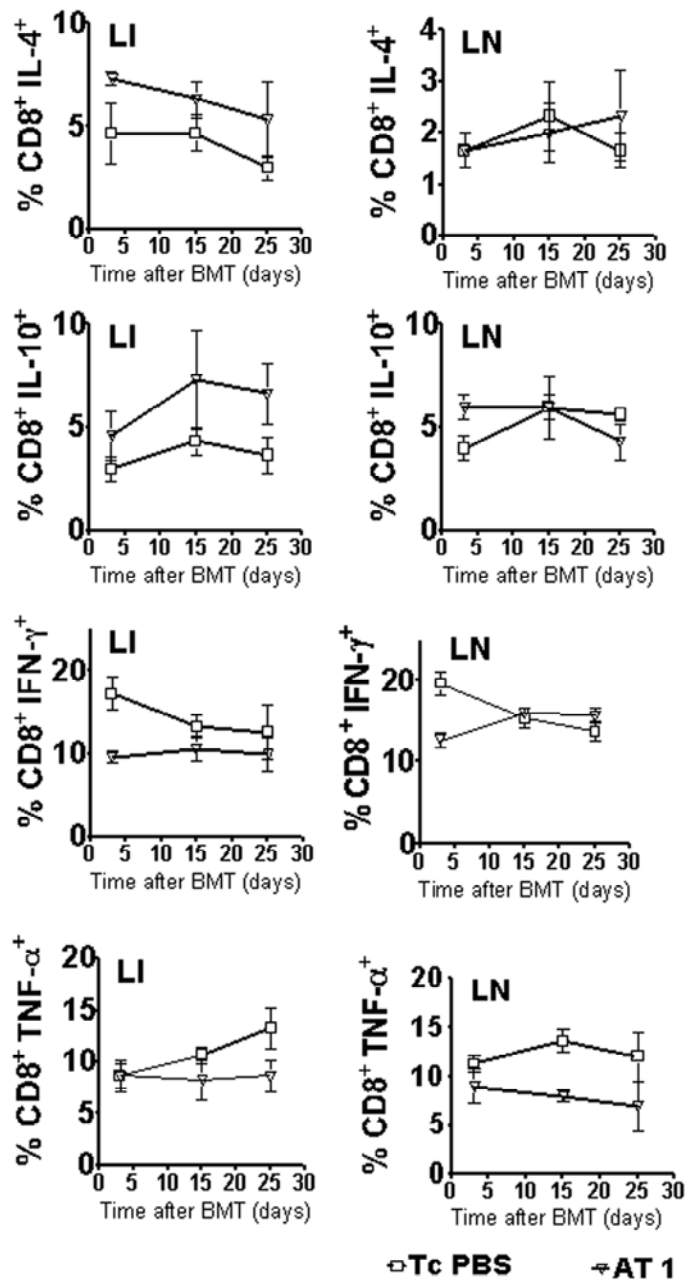

B

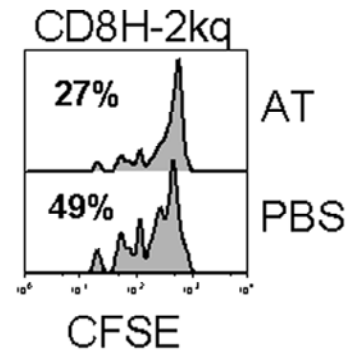

Supplement: blood_blood-2007-08-106005_2.pdf [file blood_blood-2007-08-106005_2.pdf]

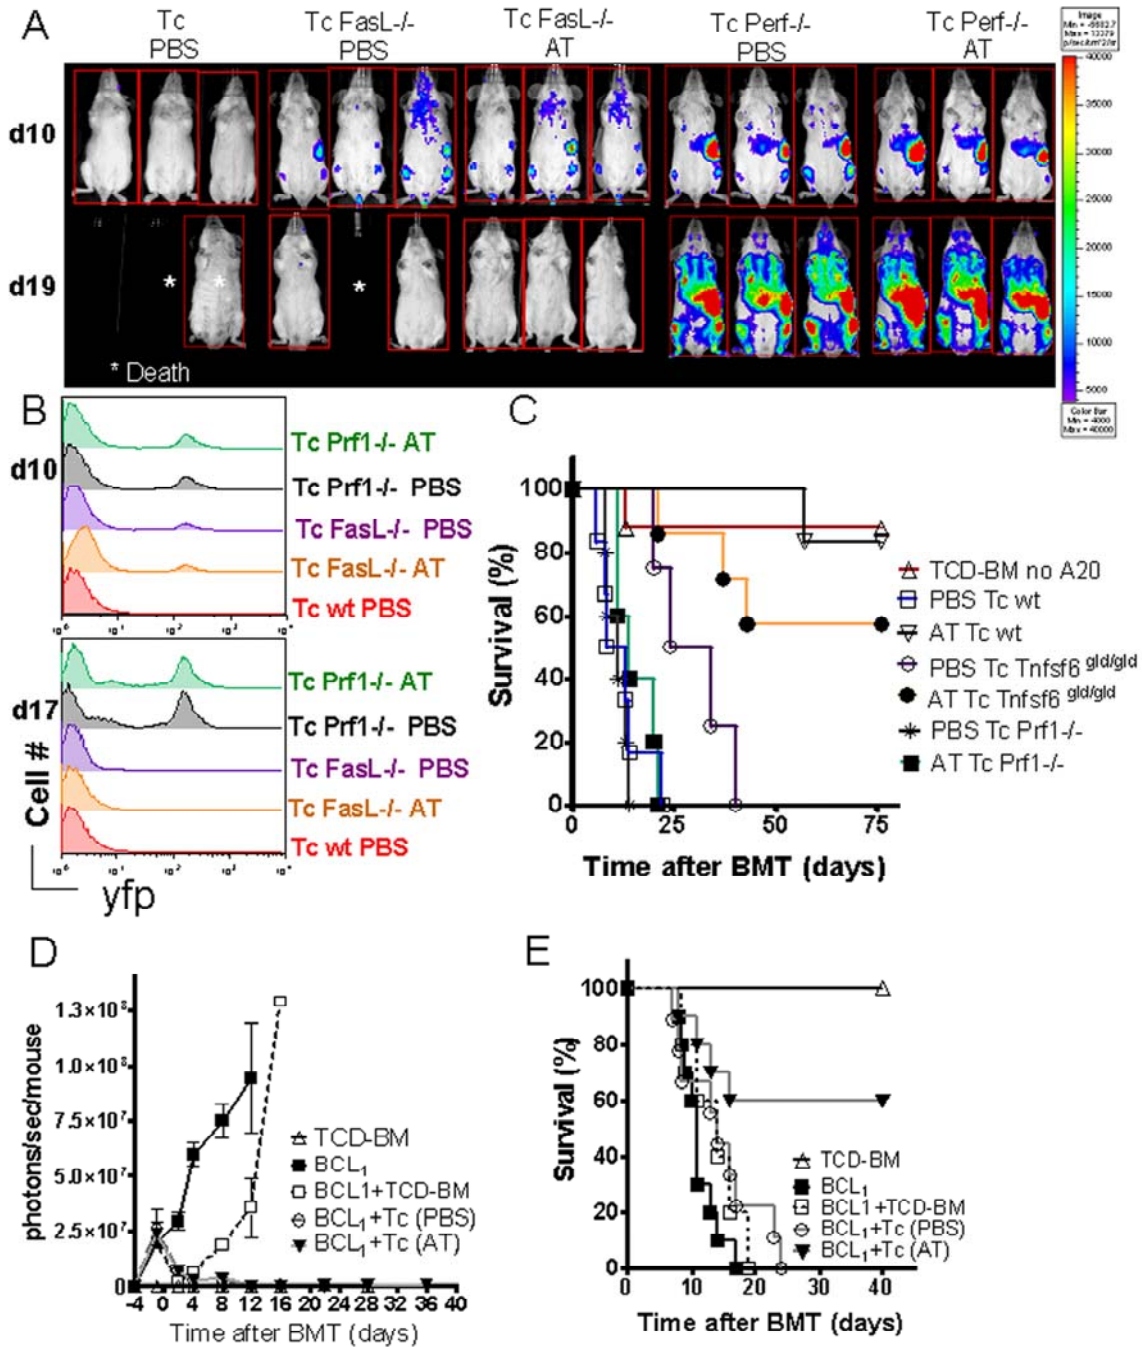

Supplement: blood_blood-2007-08-106005_3.pdf [file blood_blood-2007-08-106005_3.pdf]

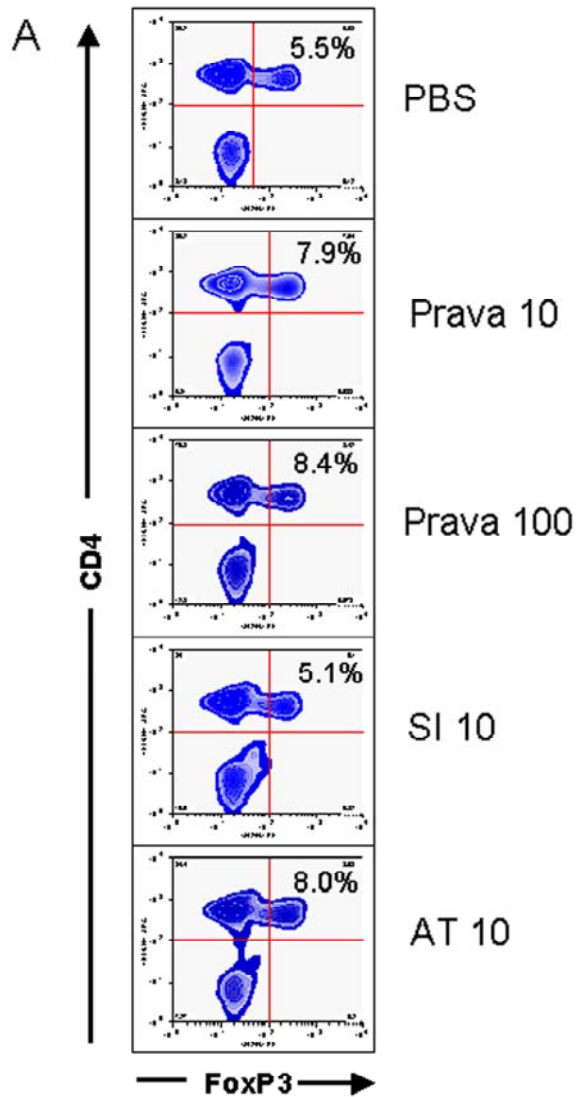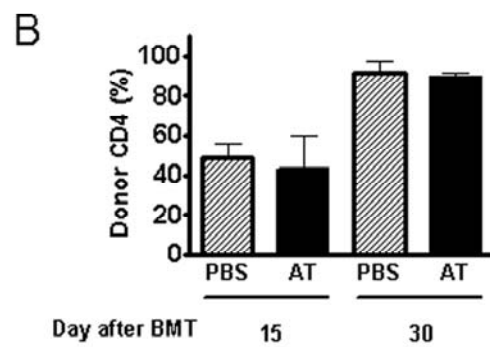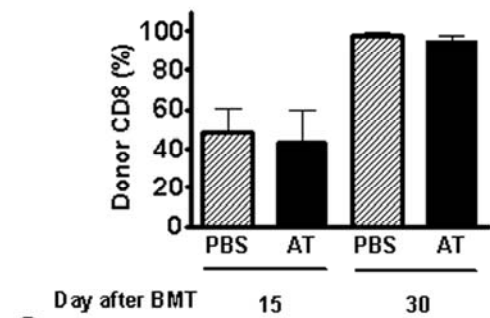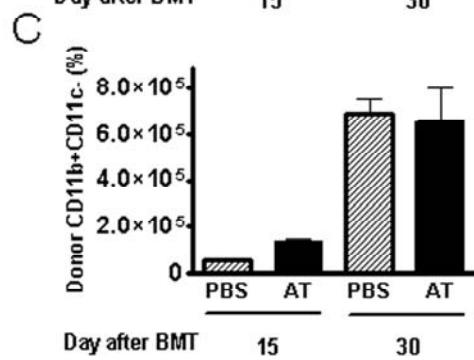

Supplement: blood_blood-2007-08-106005_4.pdf [file blood_blood-2007-08-106005_4.pdf]
